# Supplementary material for: Durable modulation of Zn(002) plane depositionviareproducible zincophilic carbon quantum dots towards low N/P ratio zinc-ion batteries
Source: Royal Society of Chemistry journal article supplement (doi:10.1039/d3mh00261f), 2023-01-01
Supplement: d3mh00261f1.pdf [file d3mh00261f1.pdf]

Supporting Information for

**Durable modulation of Zn (002) plane deposition via reproducible zincophilic carbon quantum dots towards low N/P ratio Zinc-Ion Batteries**

Zhu Xu,<sup>a</sup> Heng Li,<sup>a,b,\*</sup> Yupeng Liu,<sup>a</sup> Kexuan Wang,<sup>a</sup> Huibo Wang,<sup>a</sup> Mingzheng Ge,<sup>a</sup> Junpeng Xie,<sup>a</sup> Jielei Li,<sup>a</sup> Zhaorui Wen,<sup>a</sup> Hui Pan,<sup>a</sup> Songnan Qu,<sup>a</sup> Jilei Liu,<sup>d</sup> Yanyan Zhang,<sup>c</sup> Yuxin Tang,<sup>c,\*</sup> and Shi Chen<sup>a,\*</sup>

<sup>a</sup> Institute of Applied Physics and Materials Engineering, University of Macau, Macau SAR 999078, P. R. China

<sup>b</sup> State Key Laboratory of High-Performance Ceramics and Superfine Microstructure, Shanghai Institute of Ceramics, Chinese Academy of Sciences, Shanghai 200050, P. R. China

<sup>c</sup> College of Chemical Engineering, Fuzhou University, Fuzhou 350116, P. R. China

<sup>d</sup> College of Materials Science and Engineering, Hunan Joint International Laboratory of Advanced Materials and Technology of Clean Energy, Hunan Province Key Laboratory for Advanced Carbon Materials and Applied Technology, Hunan University, Changsha, 410082, Hunan, P.R. China

\* Corresponding authors.

E-mail: liheng@mail.sic.ac.cn;

E-mail: yxtang@fzu.edu.cn;

E-mail: shichen@um.edu.mo.

## Supplementary Figures and Tables

**Table S1** Comparison in depth of discharge (DOD) and cycling lifespan for Zn||Zn symmetric cells with different modified strategies.

| Modified strategies                                                                 | Zn foil thickness ( $\mu\text{m}$ )                             | Current density ( $\text{mA cm}^{-2}$ ) | Areal capacity ( $\text{mAh cm}^{-2}$ ) | DOD (%)   | Lifespan (h) | Ref.                                      |
|-------------------------------------------------------------------------------------|-----------------------------------------------------------------|-----------------------------------------|-----------------------------------------|-----------|--------------|-------------------------------------------|
| <i>N,S-CDs additive</i>                                                             | <b>10</b>                                                       | <b>1.95</b>                             | <b>3.9</b>                              | <b>67</b> | <b>103</b>   | <b><i>This work</i></b>                   |
| CNF-SO <sub>3</sub> Zn separator                                                    | 10 $\mu\text{m}$ on one side and 130 $\mu\text{m}$ on the other | 2                                       | 3                                       | 50        | 100          | <sup>1</sup> Adv. Funct. Mater., 2022     |
|                                                                                     |                                                                 | 1                                       | 5                                       | 80        | 60           |                                           |
| Zn <sub>3</sub> (PO <sub>4</sub> ) <sub>2</sub> /ZnF <sub>2</sub> -rich in situ SEI | 10                                                              | 3                                       | 3                                       | 50        | 250          | <sup>2</sup> Energy Environ. Sci., 2021   |
|                                                                                     |                                                                 | 4.7                                     | 4.7                                     | 80        | 120          |                                           |
| <i>N,S-CDs additive</i>                                                             | <b>20</b>                                                       | <b>1.95</b>                             | <b>7.8</b>                              | <b>67</b> | <b>250</b>   | <b><i>This work</i></b>                   |
|                                                                                     | <b>20</b>                                                       | <b>3.9</b>                              | <b>7.8</b>                              | <b>67</b> | <b>200</b>   |                                           |
| Zwitterionic hydrogel electrolyte                                                   | ~20                                                             | 20                                      | 10                                      | 80.9      | 100          | <sup>3</sup> Adv. Energy Mater., 2022     |
| Polyamide coating                                                                   | 20                                                              | 10                                      | 10                                      | 85        | 150          | <sup>4</sup> Energy Environ. Sci., 2019   |
| MX-TMA coating                                                                      | 20                                                              | 10                                      | 10                                      | 85        | 450          | <sup>5</sup> Energy Storage Mater., 2022  |
| ZGL coating                                                                         | 20                                                              | 1                                       | 5                                       | 42.7      | 560          | <sup>6</sup> Energy Storage Mater., 2022  |
|                                                                                     |                                                                 | 1                                       | 10                                      | 85.5      | 250          |                                           |
| TiO <sub>2</sub> & PVDF coating                                                     | 25                                                              | 8.85                                    | 8.85                                    | 60        | 250          | <sup>7</sup> Adv. Funct. Mater., 2021     |
| Glass fiber gasket                                                                  | ~26                                                             | 50                                      | 10                                      | 66.7      | 100          | <sup>8</sup> Angew. Chem., Int. Ed., 2022 |

|                                            |     |       |       |      |       |                                            |
|--------------------------------------------|-----|-------|-------|------|-------|--------------------------------------------|
| CO <sub>2</sub> -purged electrolyte        | 30  | 10    | 10    | 57   | 100   | <sup>9</sup> ACS Nano, 2022                |
| NH <sub>2</sub> -PSiO <sub>x</sub> coating | 30  | 20    | 10    | 57   | ~300  | <sup>10</sup> Energy Storage Mater., 2023  |
| PSN coating                                | 30  | 10    | 10    | 60   | 250   | <sup>11</sup> Adv. Funct. Mater., 2021     |
| 2-propanol composite electrolyte           | ~50 | 15    | 15    | 51.2 | 500   | <sup>12</sup> Adv. Mater., 2022            |
| Cellulose film separator                   | ~50 | 2     | 20    | 69.7 | 300   | <sup>13</sup> Energy Storage Mater., 2022  |
| ZP coating                                 | 50  | 25    | 17.67 | 65   | 200   | <sup>14</sup> Angew. Chem., Int. Ed., 2023 |
|                                            |     | 25    | 19.03 | 70   | 138   |                                            |
|                                            |     | 26.55 | 21.74 | 80   | 60    |                                            |
| Janus separator                            | ~85 | 28.3  | 28.3  | 56   | 220   | <sup>15</sup> Adv. Mater., 2022            |
| CuHCF coating                              | 100 | 30    | 30    | 51.3 | 200   | <sup>16</sup> Small, 2022                  |
| Acetone additive                           | 100 | 50    | 50    | 73.5 | 800   | <sup>17</sup> Adv. Funct. Mater., 2023     |
| Montmorillonite coating                    | 100 | 10    | 45    | 77   | >1000 | <sup>18</sup> Adv. Energy Mater., 2021     |
| ZnHAP/BC separator                         | 100 | 1     | 29.1  | 50   | 1025  | <sup>19</sup> Small, 2023                  |
|                                            |     | 1     | 46.5  | 80   | 611   |                                            |
| ZnP coating                                | 100 | 20    | 30    | 51   | 300   | <sup>20</sup> Adv. Funct. Mater., 2021     |
|                                            |     | 15    | 48    | 82   | 100   |                                            |

**Table S2** Electrochemical performance of the full cells with different modified strategies.

| Modified strategies                                                                 | Zn foil        | Cathode                                                              |                                     | Full cell performance                    |                        | Cathode area specific capacity (mAh cm <sup>-2</sup> ) | N/P ratio | Energy density (Wh kg <sup>-1</sup> ) |                       | Ref.                                            |
|-------------------------------------------------------------------------------------|----------------|----------------------------------------------------------------------|-------------------------------------|------------------------------------------|------------------------|--------------------------------------------------------|-----------|---------------------------------------|-----------------------|-------------------------------------------------|
|                                                                                     | Thickness (μm) | Material                                                             | Mass loading (mg cm <sup>-2</sup> ) | Specific capacity (mAh g <sup>-1</sup> ) | Current density        |                                                        |           | Based on active material              | Including electrolyte |                                                 |
| Nafion-Zn-X coating                                                                 | 300            | VS <sub>2</sub>                                                      | 3                                   | ~ 175                                    | 0.5 A g <sup>-1</sup>  | 0.53                                                   | 513.00    | 0.95                                  | 0.60                  | <sup>21</sup> Angew. Chem., Int. Ed., 2020      |
| Cellulose film separator                                                            | 200            | α-MnO <sub>2</sub>                                                   | 2                                   | ~ 300                                    | 0.2 A g <sup>-1</sup>  | 0.60                                                   | 189.92    | 5.80                                  | 0.15                  | <sup>13</sup> Energy Storage Mater., 2022       |
| F-GQDs additive                                                                     | 100            | MnO <sub>2</sub>                                                     | 1                                   | ~ 330                                    | 0.2 A g <sup>-1</sup>  | 0.33                                                   | 189.92    | 6.38                                  | NA                    | <sup>22</sup> Chem. Eng. J., 2023               |
| Zn <sub>3</sub> (PO <sub>4</sub> ) <sub>2</sub> /ZnF <sub>2</sub> -rich in situ SEI | 100            | α-MnO <sub>2</sub>                                                   | 1                                   | ~ 270                                    | 0.1 A g <sup>-1</sup>  | 0.27                                                   | 189.92    | 5.22                                  | 2.36                  | <sup>2</sup> Energy Environ. Sci., 2021         |
| In <sup>3+</sup> additive                                                           | 100            | V <sub>2</sub> O <sub>5</sub>                                        | 0.65                                | ~ 540                                    | 0.2 A g <sup>-1</sup>  | 0.35                                                   | 152.81    | 3.90                                  | NA                    | <sup>23</sup> Adv. Funct. Mater., 2022          |
| TiO <sub>2</sub> & PVDF coating                                                     | 80             | MnO <sub>2</sub>                                                     | 1                                   | 244                                      | 2 C                    | 0.24                                                   | 151.94    | 5.88                                  | 1.94                  | <sup>7</sup> Adv. Funct. Mater., 2021           |
| Mxene in situ coating                                                               | 50             | α-MnO <sub>2</sub>                                                   | 1                                   | ~ 300                                    | 0.2 A g <sup>-1</sup>  | 0.30                                                   | 94.96     | 11.44                                 | NA                    | <sup>24</sup> Angew. Chem., Int. Ed., 2021      |
| ZIF-8 in situ coating                                                               | 50             | LaVO <sub>4</sub>                                                    | 1.9                                 | ~ 95                                     | 10 mA cm <sup>-2</sup> | 0.18                                                   | 72.96     | 3.84                                  | NA                    | <sup>25</sup> Adv. Sci., 2020                   |
| rGO in situ coating                                                                 | 110            | V <sub>3</sub> O <sub>7</sub> ·H <sub>2</sub> O                      | 5.13                                | 245                                      | 1.5 A g <sup>-1</sup>  | 1.26                                                   | 47.09     | 6.95                                  | NA                    | <sup>26</sup> ACS Appl. Mater. Interfaces, 2018 |
| Liquefied Gas Electrolytes                                                          | 100            | Na <sub>2</sub> V <sub>6</sub> O <sub>16</sub> ·1.63H <sub>2</sub> O | ~ 3                                 | ~ 260                                    | 0.02 A g <sup>-1</sup> | 0.78                                                   | 38.65     | 8.39                                  | NA                    | <sup>27</sup> ACS Energy Lett., 2021            |
| Gelatin coating                                                                     | 50             | V <sub>6</sub> O <sub>13</sub>                                       | ~ 2                                 | ~ 375                                    | 0.1 A g <sup>-1</sup>  | 0.75                                                   | 35.06     | 15.92                                 | NA                    | <sup>28</sup> Adv. Energy Mater., 2021          |
| Montmorillonite coating                                                             | 100            | MMT-MnO <sub>2</sub>                                                 | 8.5                                 | ~ 270                                    | 2 C                    | 2.30                                                   | 22.34     | 40.21                                 | NA                    | <sup>18</sup> Adv. Energy Mater., 2021          |
| 1,4-dioxane additive                                                                | 100            | MnO <sub>2</sub>                                                     | 9.4                                 | ~ 130                                    | 0.05 A g <sup>-1</sup> | 1.22                                                   | 20.20     | 21.17                                 | NA                    | <sup>29</sup> ACS Appl. Mater. Interfaces, 2021 |

|                                            |           |                                                                  |              |            |                             |             |             |               |              |                                        |
|--------------------------------------------|-----------|------------------------------------------------------------------|--------------|------------|-----------------------------|-------------|-------------|---------------|--------------|----------------------------------------|
| PVB coating                                | 10        | MnO <sub>2</sub>                                                 | 1.13         | ~ 250      | 1 C                         | 0.28        | 16.86       | 47.71         | NA           | <sup>30</sup> Adv. Funct. Mater., 2020 |
| 1,4-dioxane additive                       | 20        | NH <sub>4</sub> V <sub>4</sub> O <sub>10</sub>                   | 13.3         | ~ 160      | 2 A g <sup>-1</sup>         | 2.13        | 2.44        | 52.00         | 11.71        | <sup>31</sup> ACS Nano, 2023           |
| FCOF coating                               | NA        | MnO <sub>2</sub>                                                 | 16           | NA         | 3 mA cm <sup>-2</sup>       | ~ 2.00      | 2.00        | 130.00        | 55.00        | <sup>32</sup> Nat. Commun., 2021       |
|                                            | NA        | MnO <sub>2</sub>                                                 | 8            | ~ 180      | 4 mA cm <sup>-2</sup>       | NA          | 5.00        | 113.00        | NA           |                                        |
|                                            | NA        | MnO <sub>2</sub>                                                 | 8            | ~ 160      | 4 mA cm <sup>-2</sup>       | NA          | 10.00       | 74.00         | NA           |                                        |
| GQDs additive                              | NA        | NVO (PDF#49-0996)                                                | 1.5          | 350        | 0.1 A g <sup>-1</sup>       | 0.53        | NA          | NA            | NA           | <sup>33</sup> Nano Energy, 2022        |
| <i>N,S-CDs additive</i>                    | <i>10</i> | <i>Na<sub>2</sub>V<sub>6</sub>O<sub>16</sub>·3H<sub>2</sub>O</i> | <i>6.56</i>  | <i>345</i> | <i>0.2 A g<sup>-1</sup></i> | <i>2.27</i> | <i>1.83</i> | <i>132.34</i> | <i>9.26</i>  | <i>This work</i>                       |
| <i>N,S-CDs additive (lean electrolyte)</i> | <i>10</i> | <i>Na<sub>2</sub>V<sub>6</sub>O<sub>16</sub>·3H<sub>2</sub>O</i> | <i>11.52</i> | <i>294</i> | <i>0.2 A g<sup>-1</sup></i> | <i>3.38</i> | <i>1.05</i> | <i>144.98</i> | <i>39.34</i> | <i>This work</i>                       |
|                                            | <i>20</i> | <i>Na<sub>2</sub>V<sub>6</sub>O<sub>16</sub>·3H<sub>2</sub>O</i> | <i>16.47</i> | <i>303</i> | <i>0.2 A g<sup>-1</sup></i> | <i>4.99</i> | <i>1.46</i> | <i>129.75</i> | <i>26.34</i> |                                        |

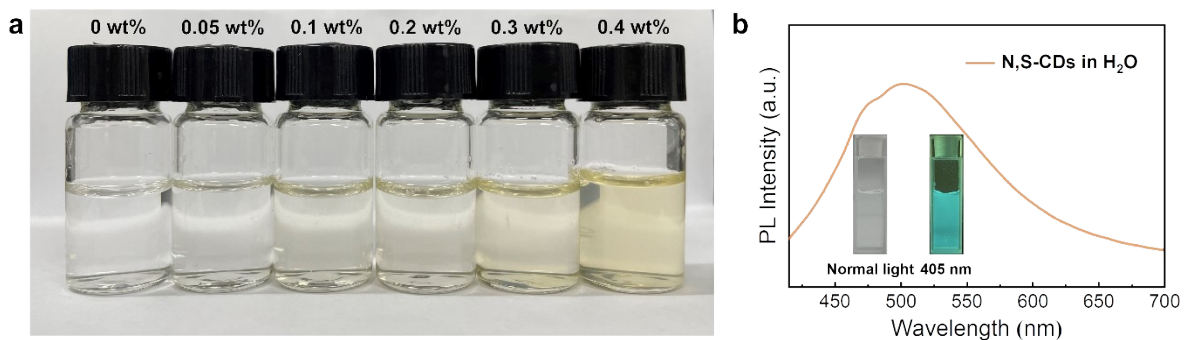

**Fig. S1** (a) Digital image of 2 M ZnSO<sub>4</sub> electrolyte solution containing various amounts (0, 0.05, 0.1, 0.2, 0.3, and 0.4 wt %) of N,S-CDs additives. (b) Photoluminescence spectra of N,S-CDs in aqueous solutions under 405 nm excitation. Inset: optical images of the N,S-CDs aqueous solution under nature light and excited by 405 nm.

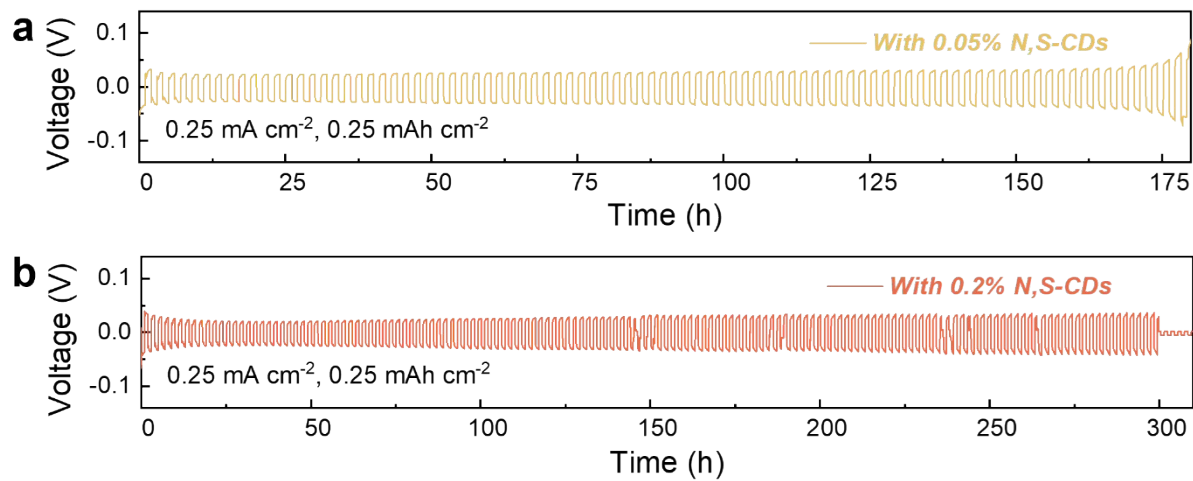

**Fig. S2** Long-term cycling performance of the Zn||Zn symmetric cells using electrolyte with (a) 0.05% N,S-CDs and (b) 0.2% N,S-CDs at 0.25 mA cm<sup>-2</sup> for 0.25 mAh cm<sup>-2</sup>.

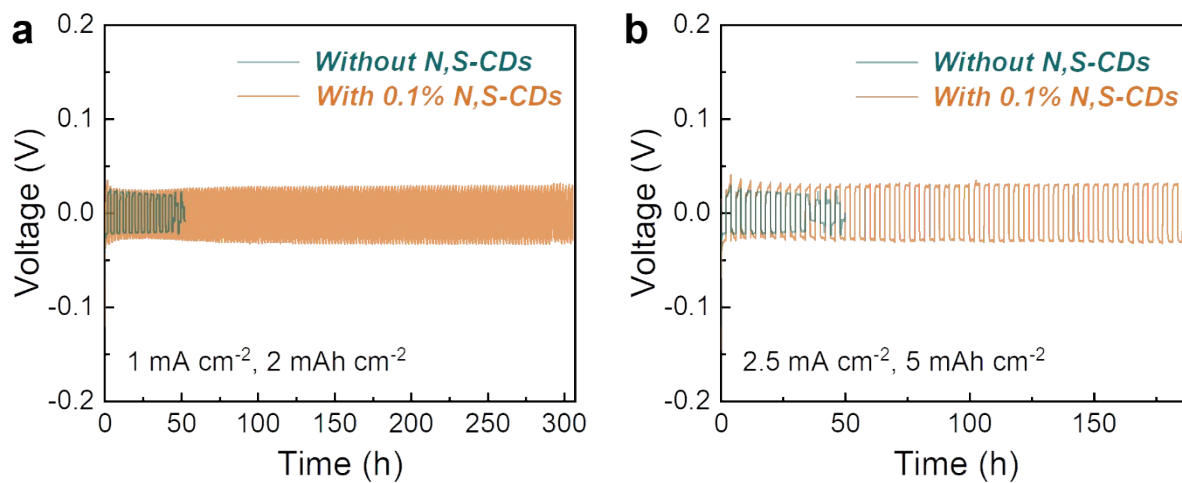

**Fig. S3** Long-term cycling performance of the Zn||Zn symmetric cells using pristine ZnSO<sub>4</sub> electrolyte and electrolyte with 0.1% N,S-CDs at (a) 1 mA cm<sup>-2</sup> for 2 mAh cm<sup>-2</sup> and (b) 2.5 mA cm<sup>-2</sup> for 5 mAh cm<sup>-2</sup>.

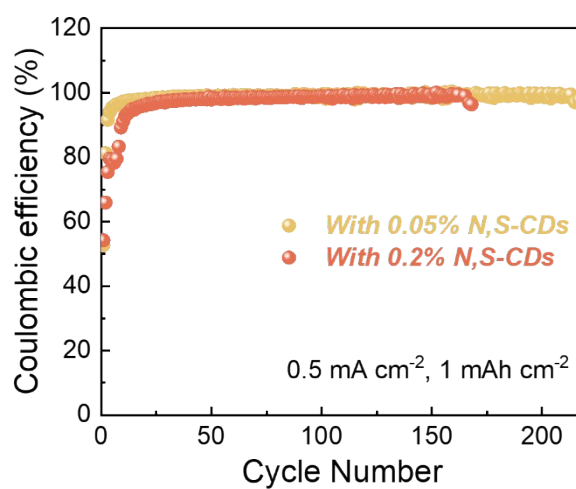

**Fig. S4** Coulombic efficiency of Zn||Cu cells using electrolyte with 0.05% N,S-CDs and 0.2% N,S-CDs at 0.5 mA cm<sup>-2</sup> for 1 mAh cm<sup>-2</sup>.



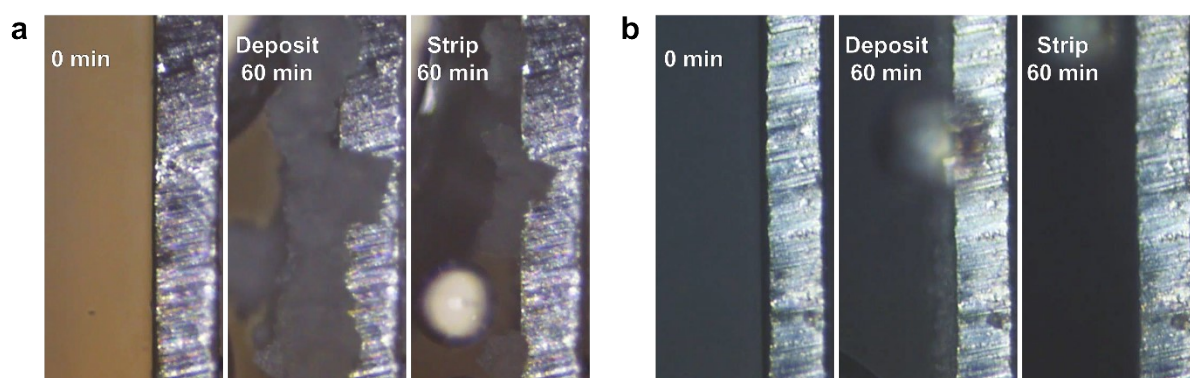

**Fig. S5** In situ OM images of the anodes deposited at  $5 \text{ mA cm}^{-2}$  for 60 minutes and then stripped at  $1 \text{ mA cm}^{-2}$  for 60 minutes in the electrolyte (a) without and (b) with 0.1% N,S-CDs.

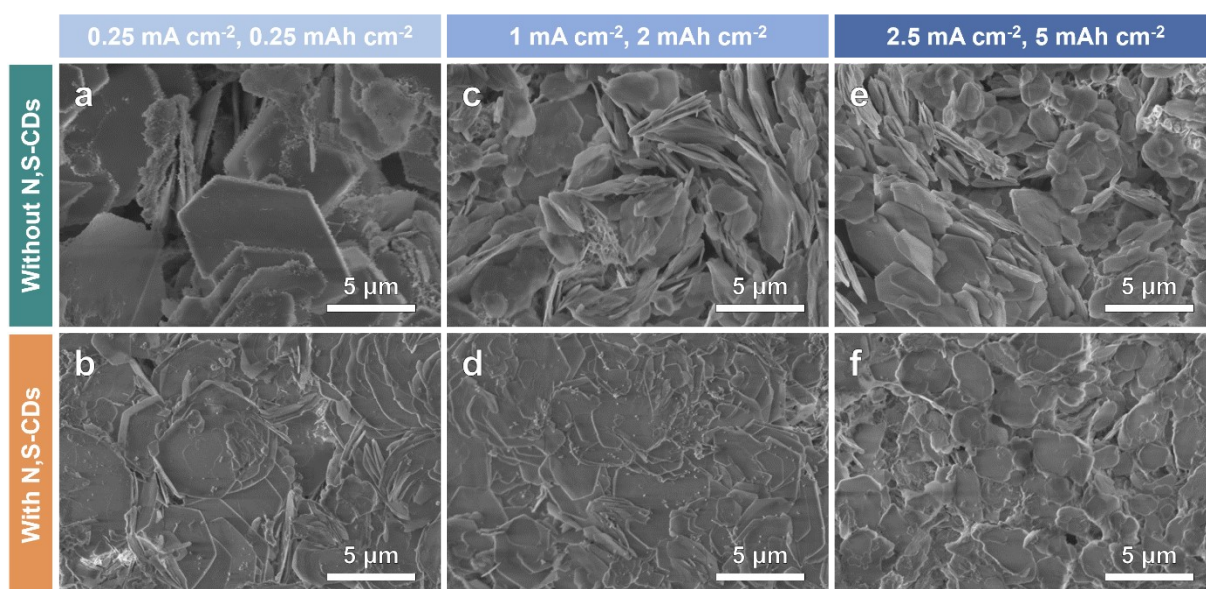

**Fig. S6** Top-view SEM images of the anodes in the Zn||Zn symmetric cells using pristine  $\text{ZnSO}_4$  electrolyte and electrolyte with 0.1% N,S-CDs at (a, b)  $0.25 \text{ mA cm}^{-2}$  for  $0.25 \text{ mAh cm}^{-2}$ , (c, d)  $1 \text{ mA cm}^{-2}$  for  $2 \text{ mAh cm}^{-2}$  and (e, f)  $2.5 \text{ mA cm}^{-2}$  for  $5 \text{ mAh cm}^{-2}$  after 15 cycles.

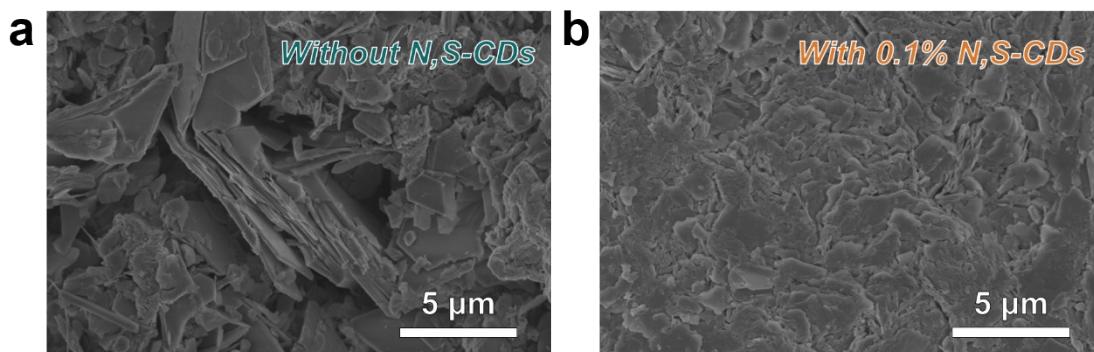

**Fig. S7** Top-view SEM images of the anodes in the Zn||Zn symmetric cells after rate test (a) without and (b) with 0.1% N,S-CDs.

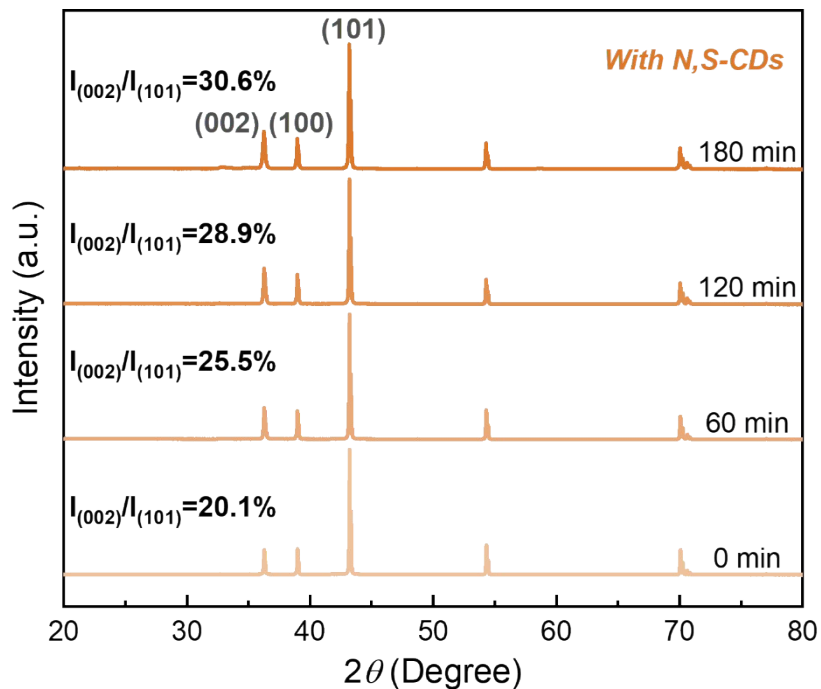

**Fig. S8** XRD patterns of the Zn deposits with deposition time from 0 to 180 minutes in the electrolyte with 0.1% N,S-CDs.

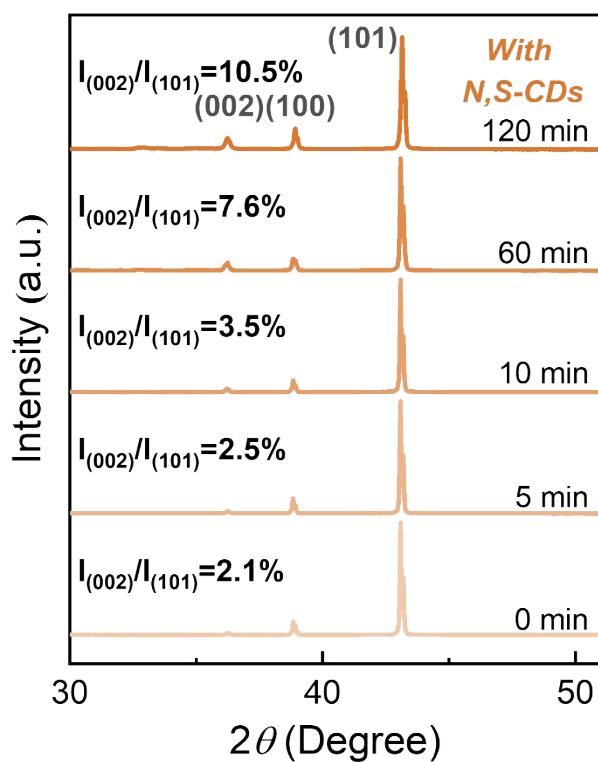

**Fig. S9** XRD patterns of the Zn anode (with a lower initial  $I_{(002)}/I_{(101)}$  ratio) using electrolyte with 0.1% N,S-CDs at various deposition time ranging from 0 to 120 min.

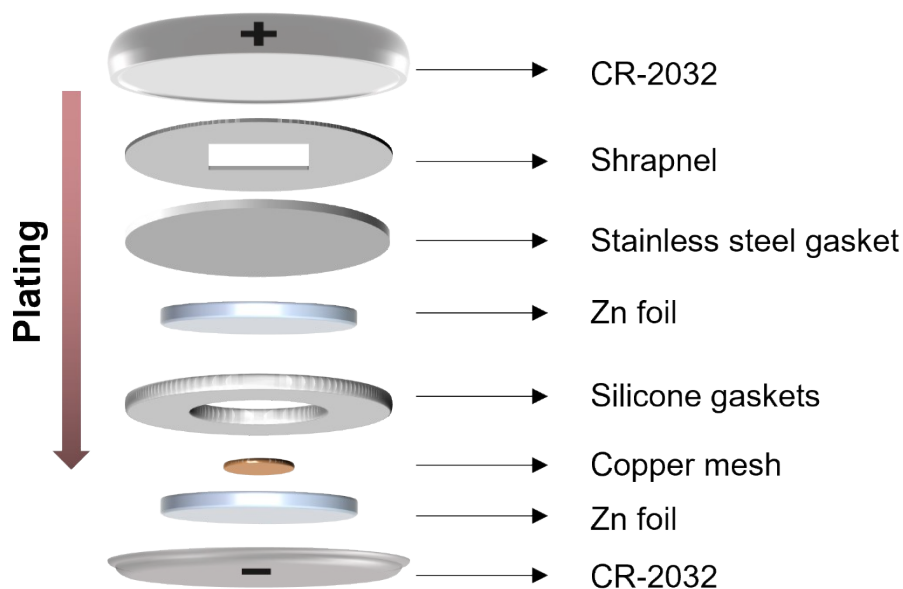

**Fig. S10** Schematic illustration of the special-design cell configuration to obtain the in situ generated Zn deposit on a Cu mesh.

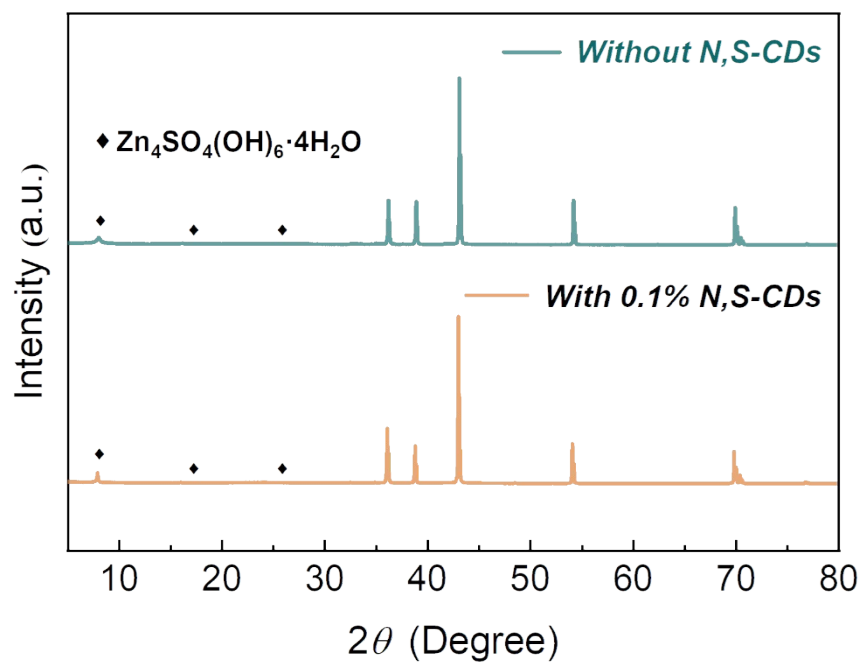

**Fig. S11** XRD patterns of the cycled Zn anode using the electrolyte without and with 0.1% N,S-CDs.

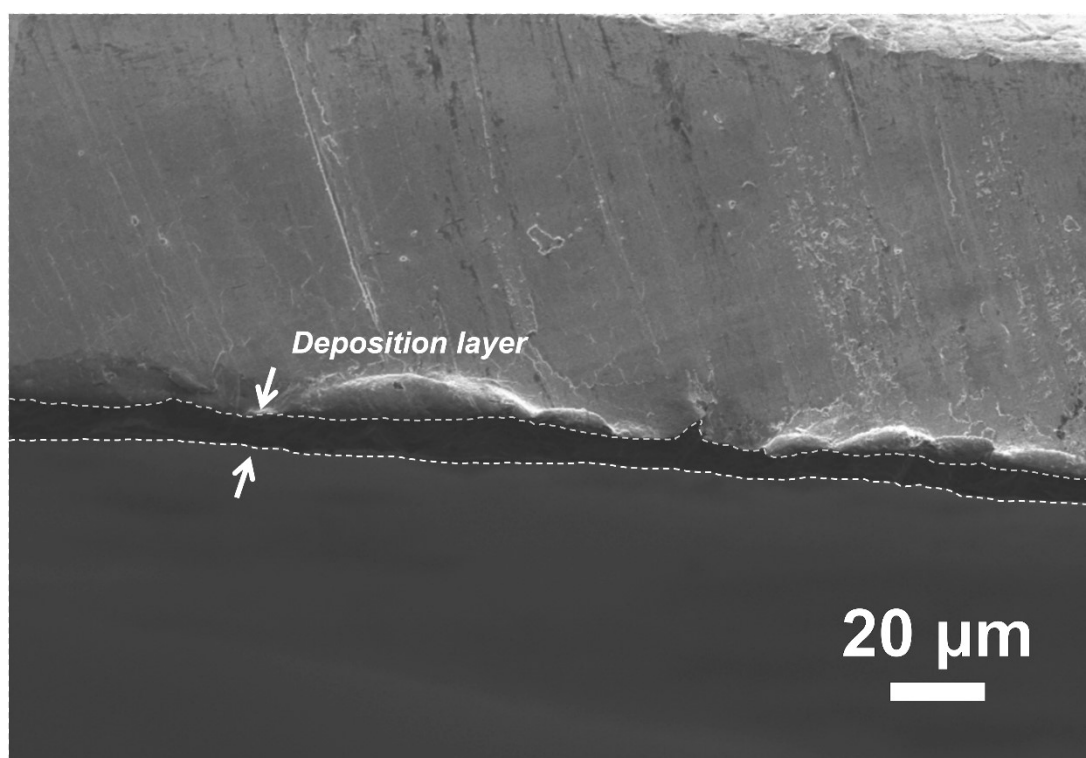

**Fig. S12** Cross-section SEM image of the anodes deposited at  $1 \text{ mA cm}^{-2}$  for  $1 \text{ mAh cm}^{-2}$  in the electrolyte with 0.1% N,S-CDs.

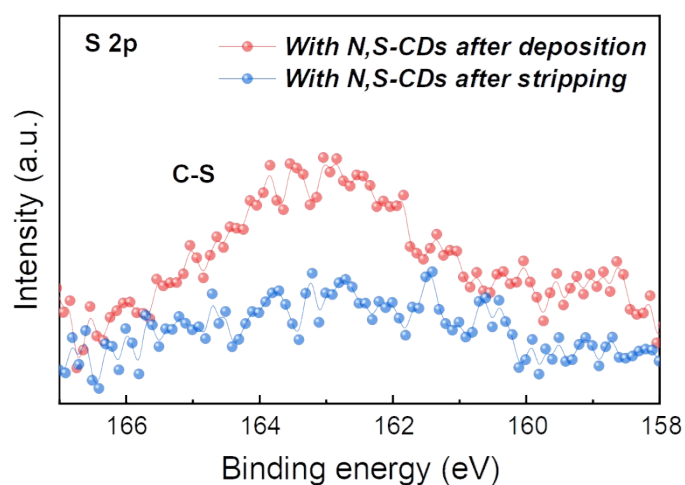

**Fig. S13** XPS high-resolution spectra of S 2p of the anode surface after deposition (deposited at  $1 \text{ mA cm}^{-2}$  for 60 minutes) and stripping (deposited at  $1 \text{ mA cm}^{-2}$  for 60 minutes and then stripped at  $1 \text{ mA cm}^{-2}$  for 60 minutes) in the electrolyte with 0.1% N,S-CDs.

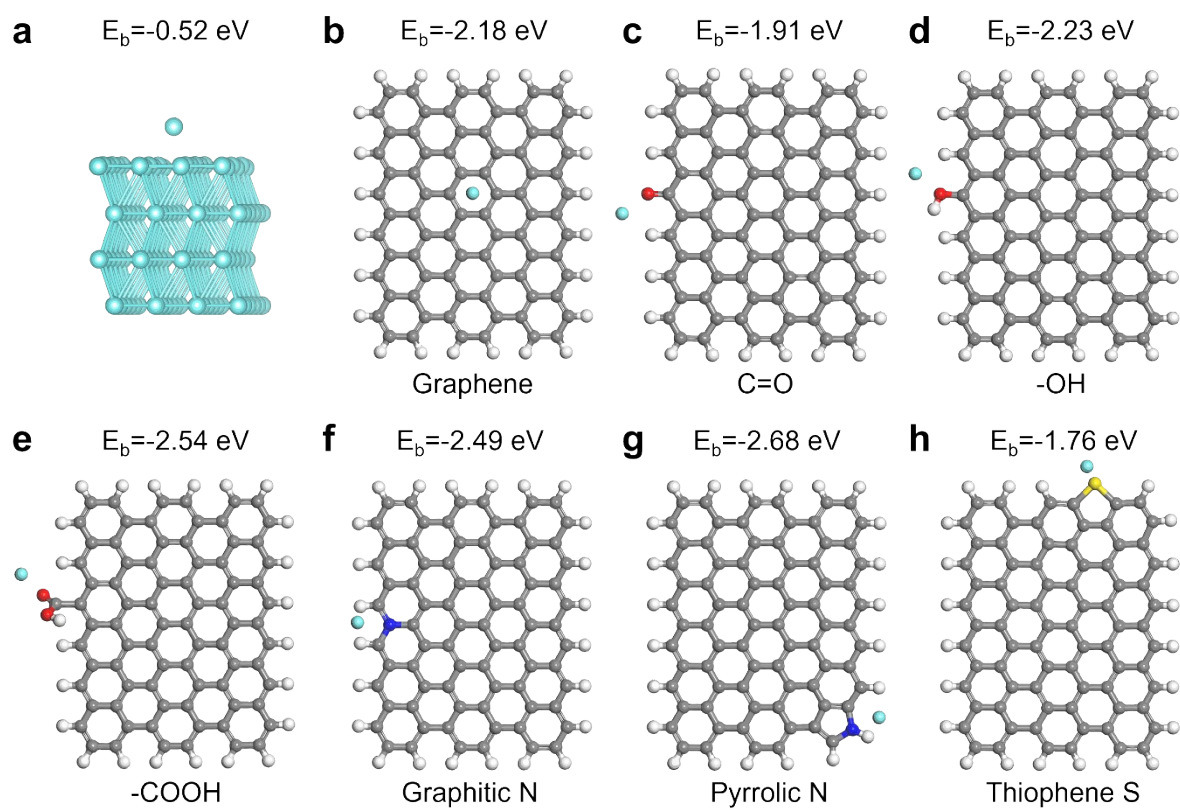

**Fig. S14** (a) Atomic model structure of binding energy between  $Zn^{2+}$  ions and Zn substrate. (b–h) Atomic model structure of binding energy between  $Zn^{2+}$  ions and graphene quantum dots with different functional groups.

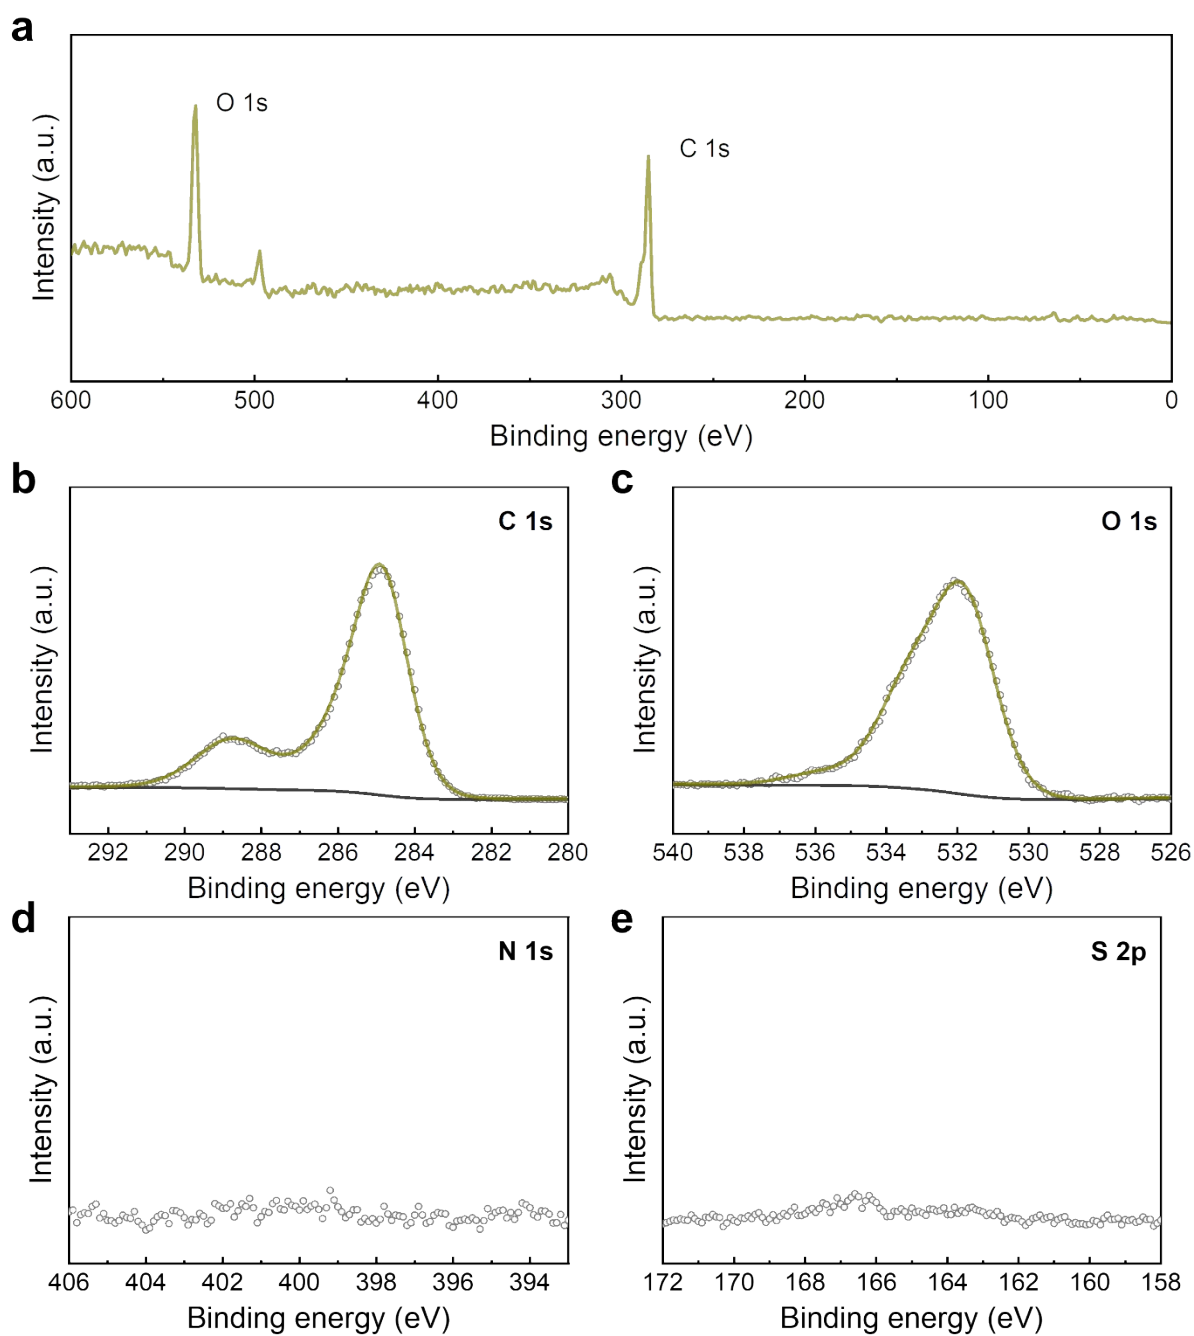

**Fig. S15** (a) The XPS full spectra of the Undoped-CDs. The XPS high-resolution spectra of (b) C 1s, (c) O 1s, (d) N 1s, and (e) S 2p of the Undoped-CDs, respectively.

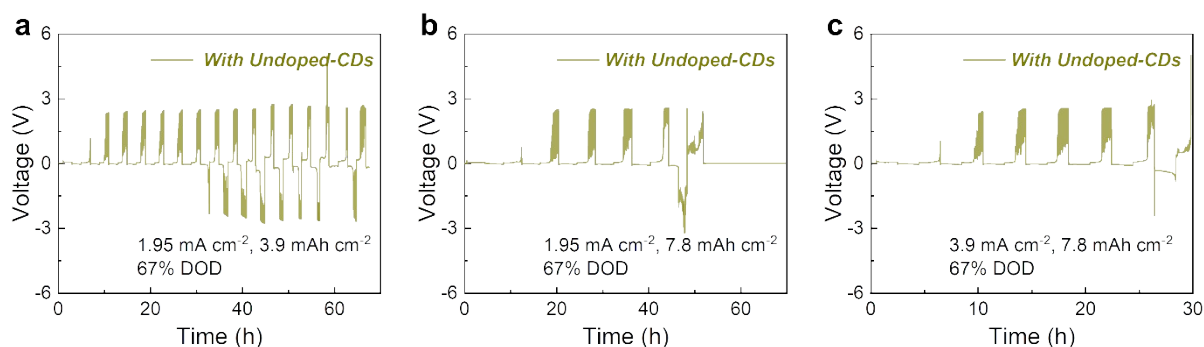

**Fig. S16** (a) Long-term cycling performance of the Zn||Zn (thickness: 10  $\mu\text{m}$ ) symmetric cells using electrolyte with 0.1% Undoped-CDs at 1.95  $\text{mA cm}^{-2}$  for 3.9  $\text{mAh cm}^{-2}$ . Long-term cycling performance of the Zn||Zn (thickness: 20  $\mu\text{m}$ ) symmetric cells using electrolyte with 0.1% Undoped-CDs at (b) 1.95  $\text{mA cm}^{-2}$  for 7.8  $\text{mAh cm}^{-2}$  and (c) 3.9  $\text{mA cm}^{-2}$  for 7.8  $\text{mAh cm}^{-2}$ .

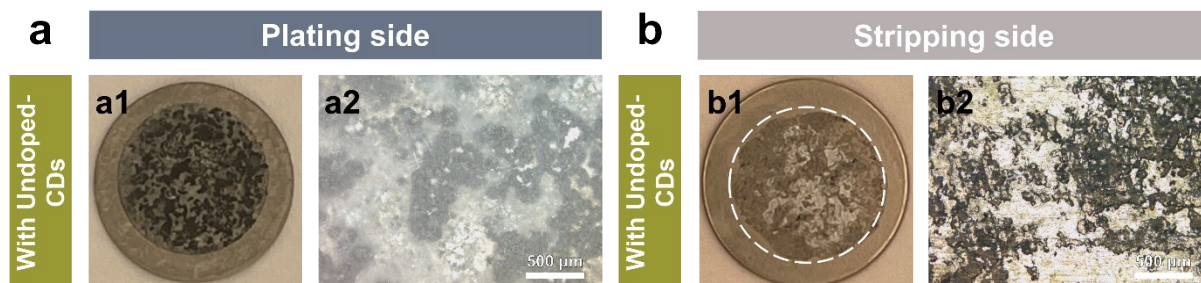

**Fig. S17** Digital images and top-view OM images of the Zn foil surface after (a) the second plating and (b) the second stripping in the Zn||Zn (thickness: 10  $\mu\text{m}$ ) symmetric cells using electrolyte with 0.1% Undoped-CDs at 1.95  $\text{mA cm}^{-2}$  for 3.9  $\text{mAh cm}^{-2}$ .



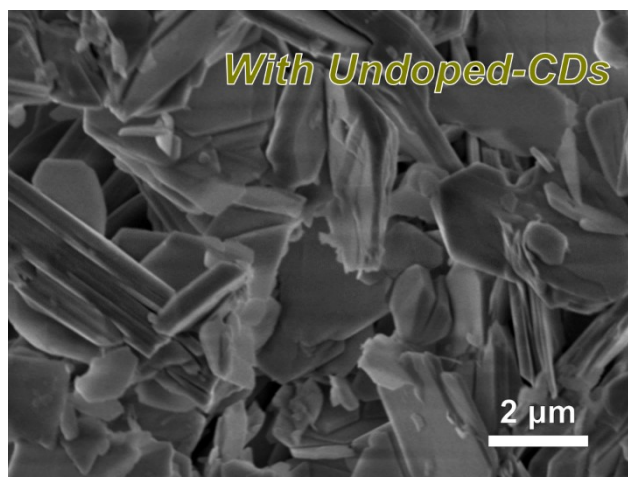

**Fig. S18** Top-view SEM images of the cycled Zn anodes using electrolyte with Undoped-CDs.

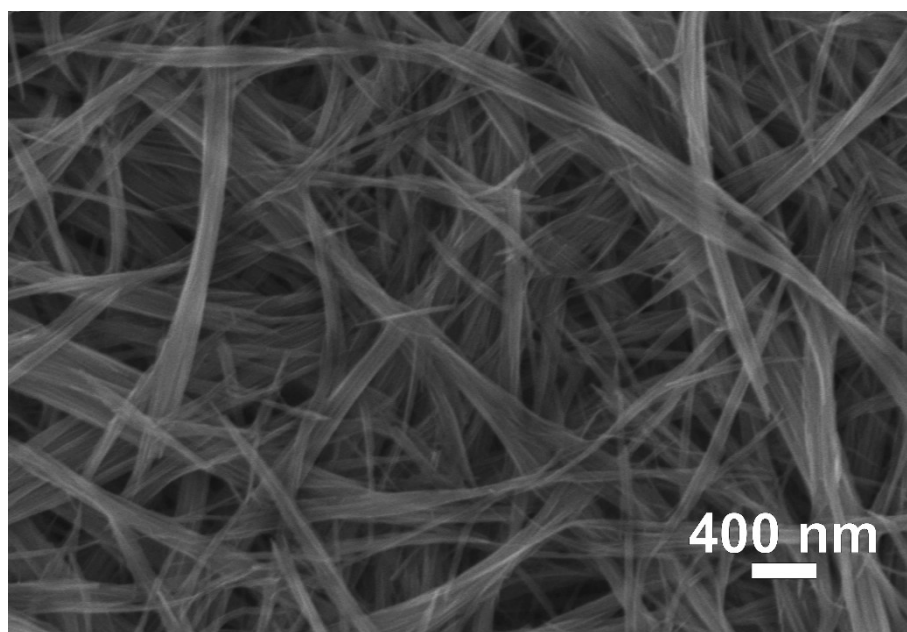

**Fig. S19** Top-view SEM image of the NVO nanobelts.

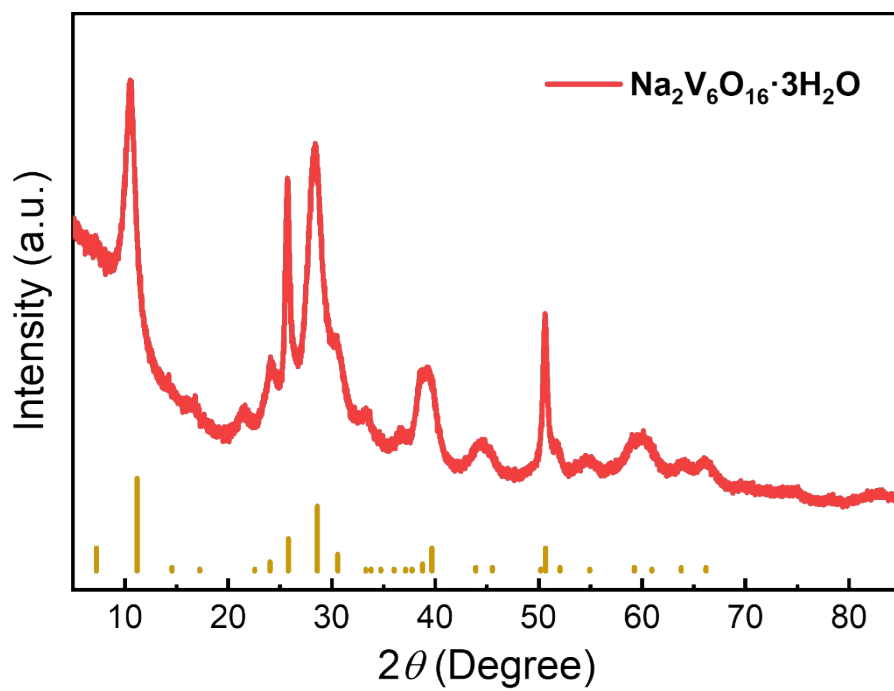

**Fig. S20** XRD pattern of the synthesized NVO material.

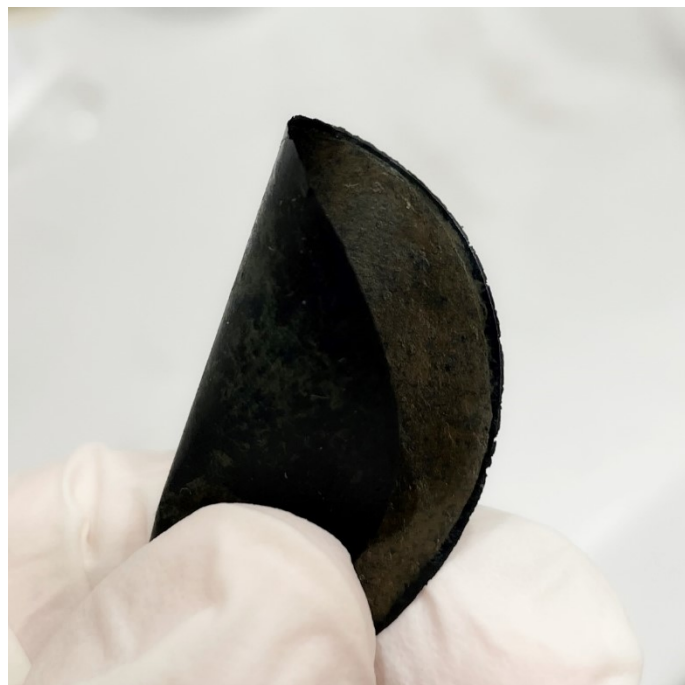

**Fig. S21** Digital image of the self-supporting cathode membrane.

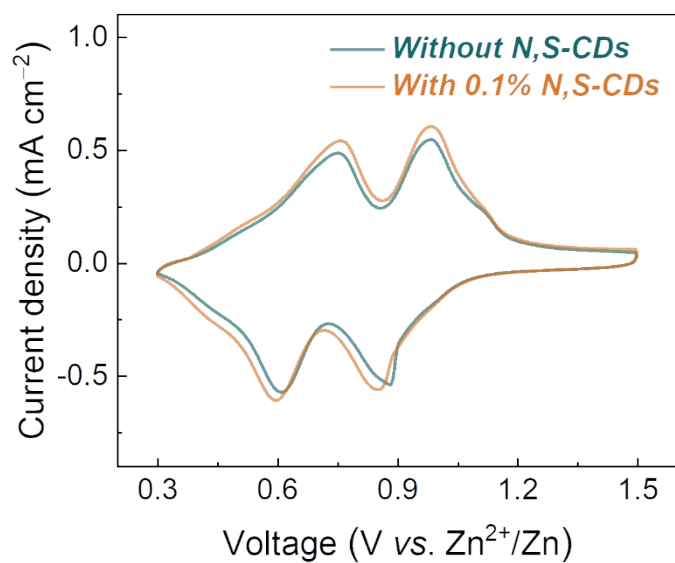

**Fig. S22** Cyclic voltammetry (CV) curves of Zn||NVO cells in a voltage range of 0.3 V to 1.5 V at 0.1 mV s<sup>-1</sup>.

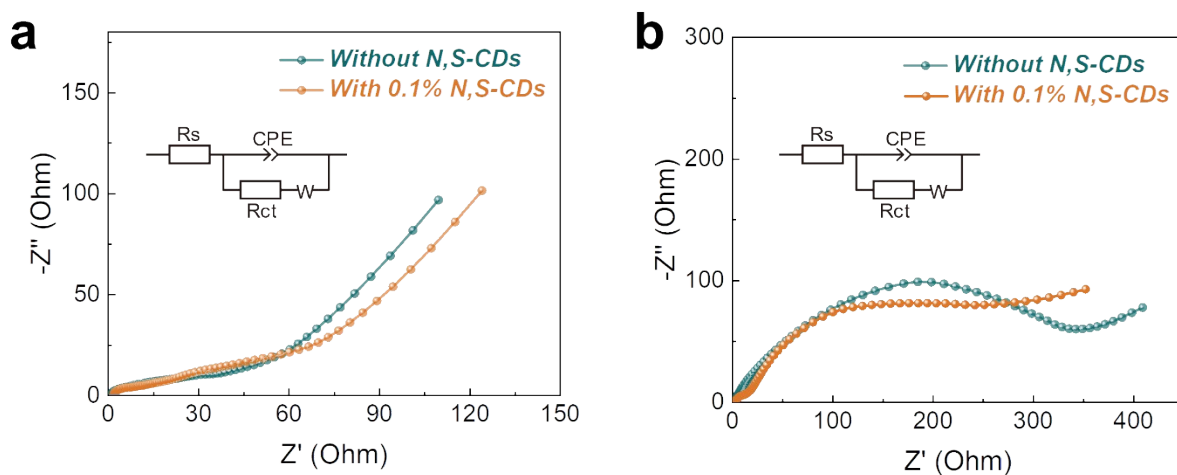

**Fig. S23** Electrochemical impedance spectroscopy (EIS) plots of Zn||NVO cells (a) before and (b) after the CV test.

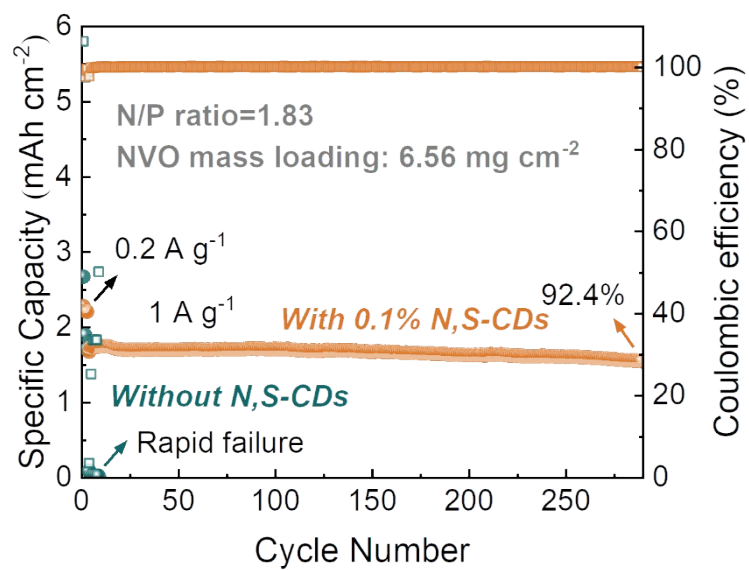

**Fig. S24** Cycling performance of the Zn||NVO full cells with low N/P ratio of 1.83.

## Reference

- 1 X. Ge, W. Zhang, F. Song, B. Xie, J. Li, J. Wang, X. Wang, J. Zhao and G. Cui, *Adv. Funct. Mater.*, 2022, **32**, 2200429.
- 2 Y. Chu, S. Zhang, S. Wu, Z. Hu, G. Cui and J. Luo, *Energy Environ. Sci.*, 2021, **14**, 3609-3620.
- 3 W. Zhang, F. Guo, H. Mi, Z.-S. Wu, C. Ji, C. Yang and J. Qiu, *Adv. Energy Mater.*, 2022, **12**, 2202219.
- 4 Z. Zhao, J. Zhao, Z. Hu, J. Li, J. Li, Y. Zhang, C. Wang and G. Cui, *Energy Environ. Sci.*, 2019, **12**, 1938-1949.
- 5 X. Zhu, X. Li, M. L. K. Essandoh, J. Tan, Z. Cao, X. Zhang, P. Dong, P. M. Ajayan, M. Ye and J. Shen, *Energy Storage Mater.*, 2022, **50**, 243-251.
- 6 H. Gan, J. Wu, R. Li, B. Huang and H. Liu, *Energy Storage Mater.*, 2022, **47**, 602-610.
- 7 R. Zhao, Y. Yang, G. Liu, R. Zhu, J. Huang, Z. Chen, Z. Gao, X. Chen and L. Qie, *Adv. Funct. Mater.*, 2021, **31**, 2001867.
- 8 Z. Cai, J. Wang, Z. Lu, R. Zhan, Y. Ou, L. Wang, M. Dahbi, J. Alami, J. Lu, K. Amine and Y. Sun, *Angew. Chem., Int. Ed.*, 2022, **61**, e202116560.
- 9 Y. Zhu, H. Y. Hoh, S. Qian, C. Sun, Z. Wu, Z. Huang, L. Wang, M. Batmunkh, C. Lai, S. Zhang and Y. L. Zhong, *ACS Nano*, 2022, **16**, 14600-14610.
- 10 J. Dong, H. Peng, J. Wang, C. Wang, D. Wang, N. Wang, W. Fan, X. Jiang, J. Yang and Y. Qian, *Energy Storage Mater.*, 2023, **54**, 875-884.
- 11 S. Zhou, Y. Wang, H. Lu, Y. Zhang, C. Fu, I. Usman, Z. Liu, M. Feng, G. Fang, X. Cao, S. Liang and A. Pan, *Adv. Funct. Mater.*, 2021, **31**, 2104361.
- 12 Q. Ma, R. Gao, Y. Liu, H. Dou, Y. Zheng, T. Or, L. Yang, Q. Li, Q. Cu, R. Feng, Z. Zhang, Y. Nie, B. Ren, D. Luo, X. Wang, A. Yu and Z. Chen, *Adv. Mater.*, 2022, **34**, e2207344.
- 13 W. Zhou, M. Chen, Q. Tian, J. Chen, X. Xu and C.-P. Wong, *Energy Storage Mater.*, 2022, **44**, 57-65.
- 14 Z. Xing, Y. Sun, X. Xie, Y. Tang, G. Xu, J. Han, B. Lu, S. Liang, G. Chen and J. Zhou, *Angew. Chem., Int. Ed.*, 2023, **62**, e202215324.
- 15 X. Zhang, J. Li, K. Qi, Y. Yang, D. Liu, T. Wang, S. Liang, B. Lu, Y. Zhu and J. Zhou, *Adv. Mater.*, 2022, **34**, 2205175.
- 16 Y. Liu, Y. Li, X. Huang, H. Cao, Q. Zheng, Y. Huo, J. Zhao, D. Lin and B. Xu, *Small*, 2022, **18**, e2203061.

- 17 X. Shi, J. Wang, F. Yang, X. Liu, Y. Yu and X. Lu, *Adv. Funct. Mater.*, 2023, **33**, 2211917.
- 18 H. Yan, S. Li, Y. Nan, S. Yang and B. Li, *Adv. Energy Mater.*, 2021, **11**, 2100186.
- 19 H. Qin, W. Chen, W. Kuang, N. Hu, X. Zhang, H. Weng, H. Tang, D. Huang, J. Xu and H. He, *Small*, 2023, **19**, e2300130.
- 20 P. Cao, X. Zhou, A. Wei, Q. Meng, H. Ye, W. Liu, J. Tang and J. Yang, *Adv. Funct. Mater.*, 2021, **31**, 2100398.
- 21 Y. Cui, Q. Zhao, X. Wu, X. Chen, J. Yang, Y. Wang, R. Qin, S. Ding, Y. Song, J. Wu, K. Yang, Z. Wang, Z. Mei, Z. Song, H. Wu, Z. Jiang, G. Qian, L. Yang and F. Pan, *Angew. Chem., Int. Ed.*, 2020, **59**, 16594-16601.
- 22 W. Han, H. Lee, Y. Liu, Y. Kim, H. Chu, G. Liu and W. Yang, *Chem. Eng. J.*, 2023, **452**, 139090.
- 23 K. Ouyang, D. Ma, N. Zhao, Y. Wang, M. Yang, H. Mi, L. Sun, C. He and P. Zhang, *Adv. Funct. Mater.*, 2022, **32**, 2109749.
- 24 N. Zhang, S. Huang, Z. Yuan, J. Zhu, Z. Zhao and Z. Niu, *Angew. Chem., Int. Ed.*, 2021, **60**, 2861-2865.
- 25 X. Liu, F. Yang, W. Xu, Y. Zeng, J. He and X. Lu, *Adv. Sci.*, 2020, **7**, 2002173.
- 26 C. Shen, X. Li, N. Li, K. Xie, J.-G. Wang, X. Liu and B. Wei, *ACS Appl. Mater. Interfaces*, 2018, **10**, 25446-25453.
- 27 L. Ma, J. Z. Lee, T. P. Pollard, M. A. Schroeder, M. A. Limpert, B. Craven, S. Fess, C. S. Rustomji, C. Wang, O. Borodin and K. Xu, *ACS Energy Lett.*, 2021, **6**, 4426-4430.
- 28 J. Shin, J. Lee, Y. Kim, Y. Park, M. Kim and J. W. Choi, *Adv. Energy Mater.*, 2021, **11**, 2100676.
- 29 R. Feng, X. Chi, Q. Qiu, J. Wu, J. Huang, J. Liu and Y. Liu, *ACS Appl. Mater. Interfaces*, 2021, **13**, 40638-40647.
- 30 J. Hao, X. Li, S. Zhang, F. Yang, X. Zeng, S. Zhang, G. Bo, C. Wang and Z. Guo, *Adv. Funct. Mater.*, 2020, **30**, 2001263.
- 31 T. Wei, Y. Ren, Y. Wang, L. Mo, Z. Li, H. Zhang, L. Hu and G. Cao, *ACS Nano*, 2023, **17**, 3765-3775.
- 32 Z. Zhao, R. Wang, C. Peng, W. Chen, T. Wu, B. Hu, W. Weng, Y. Yao, J. Zeng, Z. Chen, P. Liu, Y. Liu, G. Li, J. Guo, H. Lu and Z. Guo, *Nat. Commun.*, 2021, **12**, 6606.
- 33 H. Zhang, R. Guo, S. Li, C. Liu, H. Li, G. Zou, J. Hu, H. Hou and X. Ji, *Nano Energy*, 2022, **92**, 106752.
